# Supplementary material
Source: publisher figshare collection journal article supplement (https://geolsoc.figshare.com/ndownloader/files/12487385)
Supplement: Supplementary file 1 [file 12487385]

## Sheet: S2
Sample_name	LB1-970-975	LB1-955-960	BTDF-001	NLBT-006	VCAQ-001
Depth (ft)	970	955
Depth (m)	295.656	291.084
Altitude (m.asl.)	1.344	5.916	134	351	198
Major Elements
SiO2	50.5959	52.3416	54.6986	54.2949	52.236
TiO2	0.7122	0.75523	1.3159	1.33328	1.07663
Al2O3	14.9189	15.5965	14.4748	14.7823	14.8948
Fe2O3T	10.1215	9.46806	11.6875	11.3343	11.2617
MnO	0.15324	0.14098	0.15592	0.14607	0.16556
MgO	8.9727	7.47919	4.40609	4.64126	6.16464
CaO	8.66399	10.0817	6.47886	8.23419	9.87653
Na2O	2.32747	2.4599	1.76763	2.29479	2.43419
K2O	0.79045	0.77838	4.61559	1.60426	0.87343
P2O5	0.08493	0.09107	0.15009	0.14279	0.1227
LOI	1.37	0.33	1.03	0.53	0.58
Total	98.7113	99.5225	100.781	99.3381	99.6862
Trace Elements
Rb	33.2	35.2	101.3	77.5	38
Sr	125.9	141.1	227.3	140	173
Y	19.9	22.1	31.6	33.6	26.1
Zr	87.6	92.7	164.1	161.7	116.9
Nb	6	6	9.7	9.7	6.3
Ba	149.4	152.7	310.6	280.5	203.1
Pb	5.3	6.6	10.7	11.1	5.9
Th	6.7	6.2	12.8	11.1	7.9
U	3	1.5	3.1	3.7	0.9
Sc	31.8	35.7	36.5	36.4	42.7
V	226.4	222.1	285.3	286.2	250.9
Cr	148.9	175.5	74.9	75.6	106
Co	37	38.4	24.8	36.7	37.3
Ni	68.8	75.2	25.8	26.1	49.3
Cu	46	44.5	26.2	20.6	28.5
Zn	98.7	63	74.9	87.1	72
Ga	19.4	15.8	19.6	19.1	20.9
Molar Masses
SiO2	0.842002	0.871053	0.910278	0.903559	0.869296
TiO2	0.00891364	0.00945219	0.0164693	0.0166869	0.0134747
Al2O3	0.146321	0.152967	0.141966	0.144981	0.146085
Fe2O3T	0.0633819	0.0592902	0.0731887	0.070977	0.0705223
MnO	0.00216014	0.00198731	0.00219791	0.00205906	0.0023338
MgO	0.222648	0.185588	0.109332	0.115168	0.152969
CaO	0.154493	0.179773	0.115529	0.146829	0.176115
CaO*	0.152499	0.177634	0.112004	0.143476	0.173234
Na2O	0.037552	0.0396886	0.0285194	0.0370247	0.0392738
K2O	0.00839119	0.00826306	0.0489978	0.0170304	0.00927208
P2O5	0.000598351	0.000641609	0.00105742	0.00100599	0.00086445
Weathering Indices
CIA	42.4411	40.4084	42.8269	42.3287	39.7116
MIAo	33.2444	34.0466	41.8582	40.8503	36.6289
MIAr	23.1964	24.5363	27.6193	27.4244	24.7034
